# Supplementary material for: Prevalence and Antifungal Susceptibility of Pathogenic Yeasts in China: A 10-Year Retrospective Study in a Teaching Hospital
Source: PubMed Central journal article supplement (PMC7347963; doi:10.3389/fmicb.2020.01401), 2020-07-03
Supplement: Data_Sheet_1.pdf [file Data_Sheet_1.pdf]

**Table S1 Epidemiological cutoff values and clinical breakpoints for systemically active antifungal agents and *Candida* spp. determined by 24-h CLSI broth microdilution and SYO methods**

| Organism               | Antifungal agent | ECV (g/ml) |        |       | CBP (g/ml) |          |       | Reference |
|------------------------|------------------|------------|--------|-------|------------|----------|-------|-----------|
|                        |                  | WT         | Non-WT | S     | SDD        | I        | R     |           |
| <i>C. albicans</i>     | Amphotericin B   | ≤2         | >2     | —     | —          | —        | —     | [3]       |
|                        | Flucytosine      | ≤1         | >1     | —     | —          | —        | —     | [4]       |
|                        | Fluconazole      | —          | —      | ≤2    | 4          | —        | ≥8    | [1]       |
|                        | Itraconazole     | ≤0.12      | >0.12  | —     | —          | —        | —     | [2]       |
|                        | Posaconazole     | ≤0.06      | >0.06  | —     | —          | —        | —     | [3]       |
|                        | Voriconazole     | —          | —      | ≤0.12 | —          | 0.25–0.5 | ≥1    | [1]       |
|                        | Anidulafungin    | —          | —      | ≤0.25 | —          | 0.5      | ≥1    | [1]       |
|                        | Caspofungin      | —          | —      | ≤0.25 | —          | 0.5      | ≥1    | [1]       |
|                        | Micafungin       | —          | —      | ≤0.25 | —          | 0.5      | ≥1    | [1]       |
| <i>C. glabrata</i>     | Amphotericin B   | ≤2         | >2     | —     | —          | —        | —     | [3]       |
|                        | Flucytosine      | ≤0.25      | >0.25  | —     | —          | —        | —     | [4]       |
|                        | Fluconazole      | —          | —      | —     | ≤32        | —        | ≥64   | [3]       |
|                        | Itraconazole     | ≤4         | >4     | —     | —          | —        | —     | [3]       |
|                        | Posaconazole     | ≤1         | >1     | —     | —          | —        | —     | [3]       |
|                        | Voriconazole     | ≤0.25      | >0.25  | —     | —          | —        | —     | [3]       |
|                        | Anidulafungin    | —          | —      | ≤0.12 | —          | 0.25     | ≥0.5  | [1]       |
|                        | Caspofungin      | —          | —      | ≤0.12 | —          | 0.25     | ≥0.5  | [1]       |
|                        | Micafungin       | —          | —      | ≤0.06 | —          | 0.12     | ≥0.25 | [1]       |
| <i>C. parapsilosis</i> | Amphotericin B   | ≤2         | >2     | —     | —          | —        | —     | [3]       |
|                        | Flucytosine      | ≤0.5       | >0.5   | —     | —          | —        | —     | [4]       |
|                        | Fluconazole      | —          | —      | ≤2    | 4          | —        | ≥8    | [1]       |
|                        | Itraconazole     | ≤0.5       | >0.5   | —     | —          | —        | —     | [2]       |

|                      |                |             |          |             |    |          |          |     |
|----------------------|----------------|-------------|----------|-------------|----|----------|----------|-----|
| <i>C. tropicalis</i> | Posaconazole   | $\leq 0.25$ | $> 0.25$ | —           | —  | —        | —        | [3] |
|                      | Voriconazole   | —           | —        | $\leq 0.12$ | —  | 0.25–0.5 | $\geq 1$ | [1] |
|                      | Anidulafungin  | —           | —        | $\leq 2$    | —  | 4        | $\geq 8$ | [1] |
|                      | Caspofungin    | —           | —        | $\leq 2$    | —  | 4        | $\geq 8$ | [1] |
|                      | Micafungin     | —           | —        | $\leq 2$    | —  | 4        | $\geq 8$ | [1] |
|                      | Amphotericin B | $\leq 2$    | $> 2$    | —           | —  | —        | —        | [3] |
|                      | Flucytosine    | $\leq 0.5$  | $> 0.5$  | —           | —  | —        | —        | [4] |
|                      | Fluconazole    | —           | —        | $\leq 2$    | 4  | —        | $\geq 8$ | [1] |
|                      | Itraconazole   | $\leq 0.5$  | $> 0.5$  | —           | —  | —        | —        | [3] |
|                      | Posaconazole   | $\leq 0.12$ | $> 0.12$ | —           | —  | —        | —        | [3] |
| <i>C. krusei</i>     | Voriconazole   | —           | —        | $\leq 0.12$ | —  | 0.25–0.5 | $\geq 1$ | [1] |
|                      | Anidulafungin  | —           | —        | $\leq 0.25$ | —  | 0.5      | $\geq 1$ | [1] |
|                      | Caspofungin    | —           | —        | $\leq 0.25$ | —  | 0.5      | $\geq 1$ | [1] |
|                      | Micafungin     | —           | —        | $\leq 0.25$ | —  | 0.5      | $\geq 1$ | [1] |
|                      | Amphotericin B | $\leq 2$    | $> 2$    | —           | —  | —        | —        | [3] |
|                      | Flucytosine    | $\leq 32$   | $> 32$   | —           | —  | —        | —        | [4] |
|                      | Fluconazole    | IR          | IR       | IR          | IR | IR       | IR       | [1] |
|                      | Itraconazole   | $\leq 1$    | $> 1$    | —           | —  | —        | —        | [3] |
|                      | Posaconazole   | $\leq 0.5$  | $> 0.5$  | —           | —  | —        | —        | [3] |
|                      | Voriconazole   | —           | —        | $\leq 0.5$  | —  | 1        | $\geq 2$ | [1] |
| <i>C. lusitaniae</i> | Anidulafungin  | —           | —        | $\leq 0.25$ | —  | 0.5      | $\geq 1$ | [1] |
|                      | Caspofungin    | —           | —        | $\leq 0.25$ | —  | 0.5      | $\geq 1$ | [1] |
|                      | Micafungin     | —           | —        | $\leq 0.25$ | —  | 0.5      | $\geq 1$ | [1] |
|                      | Amphotericin B | $\leq 2$    | $> 2$    | —           | —  | —        | —        | [4] |
|                      | Flucytosine    | $\leq 0.5$  | $> 0.5$  | —           | —  | —        | —        | [4] |
|                      | Fluconazole    | $\leq 1$    | $> 1$    | —           | —  | —        | —        | [3] |

|                          |                |        |        |    |   |   |    |     |
|--------------------------|----------------|--------|--------|----|---|---|----|-----|
| <i>C. guilliermondii</i> | Itraconazole   | ≤1     | >1     | —  | — | — | —  | [3] |
|                          | Posaconazole   | ≤0.06  | >0.06  | —  | — | — | —  | [3] |
|                          | Voriconazole   | ≤0.03  | >0.03  | —  | — | — | —  | [2] |
|                          | Anidulafungin  | ≤1     | >1     | —  | — | — | —  | [3] |
|                          | Caspofungin    | ≤1     | >1     | —  | — | — | —  | [5] |
|                          | Micafungin     | ≤0.5   | >0.5   | —  | — | — | —  | [3] |
|                          | Amphotericin B | ≤2     | >2     | —  | — | — | —  | [4] |
|                          | Flucytosine    | ≤1     | >1     | —  | — | — | —  | [4] |
|                          | Fluconazole    | ≤8     | >8     | —  | — | — | —  | [3] |
|                          | Itraconazole   | ≤1     | >1     | —  | — | — | —  | [2] |
|                          | Posaconazole   | ≤0.5   | >0.5   | —  | — | — | —  | [3] |
|                          | Voriconazole   | ≤0.5   | >0.5   | —  | — | — | —  | [2] |
|                          | Anidulafungin  | —      | —      | ≤2 | — | 4 | ≥8 | [1] |
|                          | Caspofungin    | —      | —      | ≤2 | — | 4 | ≥8 | [1] |
| <i>C. kefyr</i>          | Micafungin     | —      | —      | ≤2 | — | 4 | ≥8 | [1] |
|                          | Fluconazole    | ≤1     | >1     | —  | — | — | —  | [5] |
|                          | Posaconazole   | ≤0.25  | >0.25  | —  | — | — | —  | [5] |
|                          | Voriconazole   | ≤0.015 | >0.015 | —  | — | — | —  | [5] |
|                          | Anidulafungin  | ≤0.25  | >0.25  | —  | — | — | —  | [5] |
|                          | Caspofungin    | ≤0.03  | >0.03  | —  | — | — | —  | [5] |
|                          | Micafungin     | ≤0.12  | >0.12  | —  | — | — | —  | [5] |

Note:

ECVs, epidemiological cutoff values; CBPs, clinical breakpoints; WT, wild type; non-WT, non-wild type; S, susceptible; SDD, susceptible, dose dependent; I, intermediate; R, resistant.

“—”: not available; IR: intrinsic resistance.

## References

1. CLSI. M60. Performance standards for antifungal susceptibility testing of yeasts, 1st edition. 2017 Clinical and Laboratory Standards Institute, Wayne, PA).
2. Espinel-Ingroff A, Turnidge J, Alastruey-Izquierdo A, et al. Method-Dependent Epidemiological Cutoff Values for Detection of Triazole Resistance in *Candida* and *Aspergillus* Species for the Sensititre YeastOne Colorimetric Broth and Etest Agar Diffusion Methods. *Antimicrob Agents Chemother* 2019; 63.
3. CLSI. M59. Epidemiological cutoff values for antifungal susceptibility testing, 2nd Edition., 2018 Clinical and Laboratory Standards Institute, Wayne, PA).
4. Canton E, Peman J, Hervas D, et al. Comparison of three statistical methods for establishing tentative wild-type population and epidemiological cutoff values for echinocandins, amphotericin B, flucytosine, and six *Candida* species as determined by the colorimetric Sensititre YeastOne method. *J Clin Microbiol* 2012; 50:3921-6.
5. Pfaller, M. A., and Diekema, D.J. (2012). Progress in antifungal susceptibility testing of *Candida* spp. by use of Clinical and Laboratory Standards Institute broth microdilution methods, 2010 to 2012. *J. Clin. Microbiol.* 50, 2846-2856. doi: 10.1128/JCM.00937-12

**Table S2. Species distribution of yeast isolates over 10 years of surveillance**

|                                      | <u>Overall</u> | <u>2010</u>   | <u>2011</u>    | <u>2012</u>    | <u>2013</u>    | <u>2014</u>    | <u>2015</u>    | <u>2016</u>    | <u>2017</u>    | <u>2018</u>    | <u>2019</u>    |
|--------------------------------------|----------------|---------------|----------------|----------------|----------------|----------------|----------------|----------------|----------------|----------------|----------------|
| <b>Species</b>                       | <b>No. (%)</b> | <b>No (%)</b> | <b>No. (%)</b> | <b>No. (%)</b> | <b>No. (%)</b> | <b>No. (%)</b> | <b>No. (%)</b> | <b>No. (%)</b> | <b>No. (%)</b> | <b>No. (%)</b> | <b>No. (%)</b> |
|                                      |                |               | 39             |                |                |                |                |                |                |                |                |
| <i>C. albicans</i>                   | 259 (49.2)     | 20 (35.1)     | (50.0)         | 33 (49.3)      | 12 (30.8)      | 18 (35.3)      | 30 (58.8)      | 11 (47.8)      | 15 (44.2)      | 34 (53.1)      | 47 (73.4)      |
| <i>C. parapsilosis sensu stricto</i> | 91 (17.3)      | 14 (24.6)     | 10 (12.8)      | 17 (25.4)      | 14 (35.9)      | 8 (15.7)       | 4 (7.8)        | 4 (17.4)       | 10 (29.4)      | 8 (12.5)       | 2 (3.1)        |
| <i>C. tropicalis</i>                 | 73 (13.9)      | 12 (21.1)     | 11 (14.1)      | 6 (9.0)        | 8 (20.5)       | 5 (9.8)        | 5 (9.8)        | 2 (8.7)        | 4 (11.8)       | 14 (21.9)      | 6 (9.3)        |
| <i>C. glabrata</i>                   | 52 (9.9)       | 9 (15.8)      | 14 (17.9)      | 3 (4.5)        | 5 (12.8)       | 11 (21.6)      | 4 (7.8)        | 3 (13.0)       | 1 (2.9)        |                | 2 (3.1)        |
| <i>Cryptococcus neoformans</i>       | 14 (2.7)       | 2 (3.5)       | 1 (1.3)        | 3 (4.5)        |                | 2 (3.9)        | 2 (3.9)        |                | 1 (2.9)        | 2 (3.1)        | 1 (1.6)        |
| <i>C. krusei</i>                     | 12 (2.3)       |               | 1 (1.3)        | 2 (3.0)        |                |                | 1 (2.0)        | 2 (8.7)        | 1 (2.9)        | 4 (6.3)        | 1 (1.6)        |
| <i>Trichosporon asahii</i>           | 4 (0.8)        |               |                |                |                | 2 (3.9)        | 1 (2.0)        |                |                | 1 (1.6)        |                |
| <i>Rhodotorula glutinis</i>          | 4 (0.8)        |               | 1 (1.3)        |                |                | 1 (2.0)        |                |                |                |                | 2 (3.1)        |
| <i>C. lusitaniae</i>                 | 3 (0.6)        |               |                | 2 (3.0)        |                |                |                | 1 (4.4)        |                |                |                |
| <i>C. guilliermondii</i>             | 3 (0.6)        |               | 1 (1.3)        |                |                |                | 1 (2.0)        |                |                |                | 1 (1.6)        |
| <i>C. inconspicua</i>                | 3 (0.6)        |               |                |                |                | 1 (2.0)        |                |                |                | 1 (1.6)        | 1 (1.6)        |
| <i>Pichia anomalus</i>               | 2 (0.4)        |               |                |                |                |                | 2 (3.9)        |                |                |                |                |
| <i>C. metapsilosis</i>               | 1 (0.2)        |               |                |                |                |                |                |                | 1 (2.9)        |                |                |
| <i>C. utilis</i>                     | 1 (0.2)        |               |                |                |                |                |                |                | 1 (2.9)        |                |                |
| <i>C. lipolytica</i>                 | 1 (0.2)        |               |                | 1 (1.5)        |                |                |                |                |                |                |                |
| <i>C. kefyri</i>                     | 1 (0.2)        |               |                |                |                |                | 1 (2.0)        |                |                |                |                |
| <i>Cryptococcus curvatus</i>         | 1 (0.2)        |               |                |                |                | 1 (2.0)        |                |                |                |                |                |
| <i>C. carpophila</i>                 | 1 (0.2)        |               |                |                |                |                |                |                |                |                | 1 (1.6)        |
| <i>Trichosporon inkin</i>            | 1 (0.2)        |               |                |                |                | 1 (2.0)        |                |                |                |                |                |

**Table S3. Yeast species recovered from clinical samples**

| <b>N (%)</b>                         | <b>Blood</b> | <b>BALF</b> | <b>Ascitic fluid</b> | <b>Pleural fluid</b> | <b>Pus</b> | <b>CSF</b> | <b>Peritoneal dialysis</b> | <b>CVC</b> | <b>Bile</b> | <b>Hydrarthrosis</b> | <b>Tissue</b> | <b>Bone marrow</b> |
|--------------------------------------|--------------|-------------|----------------------|----------------------|------------|------------|----------------------------|------------|-------------|----------------------|---------------|--------------------|
| <i>C. albicans</i>                   | 61 (33.2)    | 104 (72.7)  | 39 (48.8)            | 19 (48.7)            | 9 (40.9)   | 11 (57.9)  | 1 (6.3)                    | 5 (55.6)   | 5 (62.5)    | 2 (66.7)             | 2 (66.7)      | 0                  |
| <i>C. parapsilosis sensu stricto</i> | 48 (26.1)    | 8 (5.6)     | 9 (11.3)             | 5 (12.8)             | 7 (31.8)   | 1 (5.3)    | 11 (68.8)                  | 1 (11.1)   | 0           | 1 (33.3)             | 0             | 0                  |
| <i>C. tropicalis</i>                 | 26 (14.1)    | 17 (11.9)   | 15 (18.8)            | 6 (15.4)             | 2 (9.1)    | 0          | 2 (12.5)                   | 2 (22.2)   | 1 (12.5)    | 0                    | 1 (33.3)      | 0                  |
| <i>C. glabrata</i>                   | 31 (71.2)    | 3 (2.1)     | 9 (11.3)             | 3 (7.7)              | 3 (13.6)   | 1 (5.3)    | 0                          | 1 (11.1)   | 1 (12.5)    | 0                    | 0             | 0                  |
| <i>C. krusei</i>                     | 4 (2.2)      | 4 (2.8)     | 3 (3.8)              | 2 (5.1)              | 0          | 0          | 0                          | 0          | 0           | 0                    | 0             | 0                  |
| <i>C. guilliermondii</i>             | 1 (0.5)      | 1 (0.7)     | 1 (1.3)              | 0                    | 0          | 0          | 1 (6.3)                    | 0          | 0           | 0                    | 0             | 0                  |
| <i>C. inconspicua</i>                | 0            | 0           | 0                    | 2                    | 0          | 0          | 0                          | 0          | 11 (12.5)   | 0                    | 0             | 0                  |
| <i>C. lusitanae</i>                  | 0            | 3 (2.1)     | 0                    | 0                    | 0          | 0          | 0                          | 0          | 0           | 0                    | 0             | 0                  |
| <i>C. utilis</i>                     | 0            | 0           | 1 (1.3)              | 0                    | 0          | 0          | 0                          | 0          | 0           | 0                    | 0             | 0                  |
| <i>C. metapsilosis</i>               | 0            | 0           | 1 (1.3)              | 0                    | 0          | 0          | 0                          | 0          | 0           | 0                    | 0             | 0                  |
| <i>R. glutinis</i>                   | 3 (1.6)      | 0           | 0                    | 0                    | 0          | 0          | 1 (6.3)                    | 0          | 0           | 0                    | 0             | 0                  |
| <i>Cryptococcus spp.</i>             | 3 (1.6)      | 3 (2.1)     | 0                    | 2 (5.1)              | 0          | 6 (31.6)   | 0                          | 0          | 0           | 0                    | 0             | 1                  |
| <i>Trichosporon spp.</i>             | 2 (1.1)      | 0           | 1 (1.3)              | 0                    | 1 (4.5)    | 0          | 0                          | 0          | 0           | 0                    | 0             | 0                  |
| <i>Other spp.</i>                    | 5 (2.7)      | 0           | 1 (1.3)              | 0                    | 0          | 0          | 0                          | 0          | 0           | 0                    | 0             | 0                  |
| <b>In total</b>                      | 184 (34.9)   | 143 (27.1)  | 80 (15.2)            | 39 (7.4)             | 22 (4.2)   | 19 (3.6)   | 16 (3.0)                   | 9 (1.7)    | 8 (1.5)     | 3 (0.5)              | 3 (0.5)       | 1 (0.2)            |

**Table S4. Yeast species isolated from candidemia patients**

| Species                              | 2010 | 2011 | 2012 | 2013 | 2014 | 2015 | 2016 | 2017 | 2018 | 2019 | Total (n, %) |
|--------------------------------------|------|------|------|------|------|------|------|------|------|------|--------------|
| <i>C. albicans</i>                   | 2    | 13   | 6    | 5    | 5    | 7    | 2    | 4    | 12   | 5    | 61 (33.2)    |
| <i>C. parapsilosis sensu stricto</i> | 6    | 3    | 9    | 13   | 4    | 3    | 3    | 3    | 3    | 1    | 48 (26.1)    |
| <i>C. glabrata</i>                   | 6    | 9    | 1    | 2    | 9    | 2    | 1    | 0    | 0    | 1    | 31 (16.8)    |
| <i>C. tropicalis</i>                 | 4    | 3    | 2    | 5    | 3    | 2    | 1    | 1    | 4    | 1    | 26 (14.1)    |
| <i>C. krusei</i>                     | 0    | 0    | 1    | 0    | 0    | 0    | 1    | 0    | 2    | 0    | 4 (2.2)      |
| <i>Cryptococcus neoformans</i>       | 0    | 0    | 0    | 0    | 2    | 1    | 0    | 0    | 0    | 0    | 3 (1.6)      |
| <i>Trichosporon asahii</i>           | 0    | 0    | 0    | 0    | 2    | 0    | 0    | 0    | 0    | 0    | 2 (1.1)      |
| <i>Pichia anomalus</i>               | 0    | 0    | 0    | 0    | 0    | 2    | 0    | 0    | 0    | 0    | 2 (1.1)      |
| <i>Rhodotorula glutinis</i>          | 0    | 0    | 0    | 0    | 1    | 0    | 0    | 0    | 0    | 2    | 3 (1.6)      |
| <i>C. kefir</i>                      | 0    | 0    | 0    | 0    | 0    | 1    | 0    | 0    | 0    | 0    | 1 (0.5)      |
| <i>C. lipolytica</i>                 | 0    | 0    | 1    | 0    | 0    | 0    | 0    | 0    | 0    | 0    | 1 (0.5)      |
| <i>C. carpophila</i>                 | 0    | 0    | 0    | 0    | 0    | 0    | 0    | 0    | 0    | 1    | 1 (0.5)      |
| <i>C. guilliermondi</i>              | 0    | 0    | 0    | 0    | 0    | 0    | 0    | 0    | 0    | 1    | 1 (0.5)      |
| Total                                | 18   | 28   | 20   | 25   | 26   | 18   | 8    | 8    | 21   | 12   | 184          |

**Table S5. Cross-resistance to triazoles in the 527 tested isolates**

| <i>Candida</i> species (number of isolates tested)       | Number (%) of isolates with resistance or non-wild-type to indicated triazoles |
|----------------------------------------------------------|--------------------------------------------------------------------------------|
| <i>C. albicans</i> (259)                                 | 12 (4.6)                                                                       |
| Fluconazole + itraconazole + posaconazole + voriconazole | 4 (1.5)                                                                        |
| Fluconazole + itraconazole + posaconazole                | 2 (0.8)                                                                        |
| Itraconazole + posaconazole                              | 6 (2.3)                                                                        |

|                                                          |                  |
|----------------------------------------------------------|------------------|
| <b><i>C. glabrata</i> (52)</b>                           | <b>23 (44.2)</b> |
| Fluconazole + itraconazole + posaconazole + voriconazole | 4 (7.7)          |
| Fluconazole + voriconazole + posaconazole                | 5 (9.6)          |
| Fluconazole + voriconazole                               | 5 (9.6)          |
| Voriconazole + posaconazole                              | 9 (17.3)         |
| <b><i>C. tropicalis</i> (73)</b>                         | <b>24 (32.9)</b> |
| Fluconazole + posaconazole + voriconazole + itraconazole | 15 (20.6)        |
| Fluconazole + posaconazole + itraconazole                | 1 (1.3)          |
| Fluconazole + posaconazole + voriconazole                | 4 (5.5)          |
| Fluconazole + posaconazole                               | 4 (5.5)          |
| <b><i>C. krusei</i> (12)</b>                             | <b>1 (8.3)</b>   |
| Fluconazole + posaconazole + voriconazole                | 1 (8.3)          |

**Table S6. Resistance to antifungals of yeast isolates from fungemia patient**

| <b><i>Candida</i> species (n)</b> | <b>with resistance or non-wild-type to indicated<br/>antifungal<br/>n (%)</b> |
|-----------------------------------|-------------------------------------------------------------------------------|
| <b><i>C. albicans</i> (61)</b>    | <b>8 (13.1)</b>                                                               |
| Posaconazole                      | 3 (4.9)                                                                       |
| Anidulafungin + Micafungin        | 1 (1.6)                                                                       |
| Fluconazole + posaconazole        | 1 (1.6)                                                                       |
| Itraconazole + posaconazole       | 1 (1.6)                                                                       |



|                                                                                                      |                  |
|------------------------------------------------------------------------------------------------------|------------------|
| Caspofungin + Anidulafungin + Micafungin + Flucytosine + posaconazole                                | 1 (1.6)          |
| Fluconazole + itraconazole + posaconazole + voriconazole                                             | 1 (1.6)          |
| <b><i>C. glabrata</i> (31)</b>                                                                       | <b>23 (74.2)</b> |
| Voriconazole                                                                                         | 4 (12.9)         |
| posaconazole + voriconazole                                                                          | 8 (25.8)         |
| Fluconazole + voriconazole                                                                           | 3 (9.7)          |
| Fluconazole + voriconazole + posaconazole                                                            | 4 (12.9)         |
| Fluconazole + voriconazole + posaconazole + itraconazole                                             | 3 (9.7)          |
| Caspofungin + Anidulafungin + Micafungin                                                             | 1 (3.2)          |
| <b><i>C. tropicalis</i> (26)</b>                                                                     | <b>19 (73.1)</b> |
| Fluconazole                                                                                          | 1 (5.3)          |
| Posaconazole                                                                                         | 8 (30.8)         |
| posaconazole + voriconazole+itraconazole                                                             | 2 (7.7)          |
| Fluconazole + voriconazole + posaconazole + itraconazole                                             | 7 (25.5)         |
| Fluconazole + voriconazole posaconazole + itraconazole + Caspofungin<br>+ Anidulafungin + Micafungin | 1 (3.8)          |
| <b><i>C. parapsilosis sensu stricto</i> 48)</b>                                                      | <b>2 (4.2)</b>   |
| Fluconazole                                                                                          | 1 (2.1)          |
| Flucytosine                                                                                          | 1 (2.1)          |

---
